# Supplementary material for: Size Effect of a Piezoelectric Material as a Separator Coating Layer for Suppressing Dendritic Li Growth in Li Metal Batteries
Source: MDPI journal article supplement (doi:10.3390/nano13010090), 2022-12-24
Supplement: s1 [file s1]

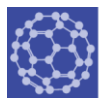

Supplementary Materials

# Size Effect of a Piezoelectric Material as a Separator Coating Layer for Suppressing Dendritic Li Growth in Li Metal Batteries

Junghwan Kim <sup>1,2,†</sup>, Kihwan Kwon <sup>1,2,†</sup>, Kwanghyun Kim <sup>1,2,†</sup>, Seungmin Han <sup>1</sup>, Patrick Joohyun Kim <sup>2,\*</sup> and Junghyun Choi <sup>1,\*</sup>

<sup>1</sup> Energy Storage Materials Center, Korea Institute of Ceramic Engineering and Technology, Jinju 52851, Republic of Korea

<sup>2</sup> Department of Applied Chemistry, Kyungpook National University, Daegu 41566, Republic of Korea

\* Correspondence: pjkim@knu.ac.kr (P.J.K.); jchoi@kicet.re.kr (J.C.)

† These authors contributed equally to this work.

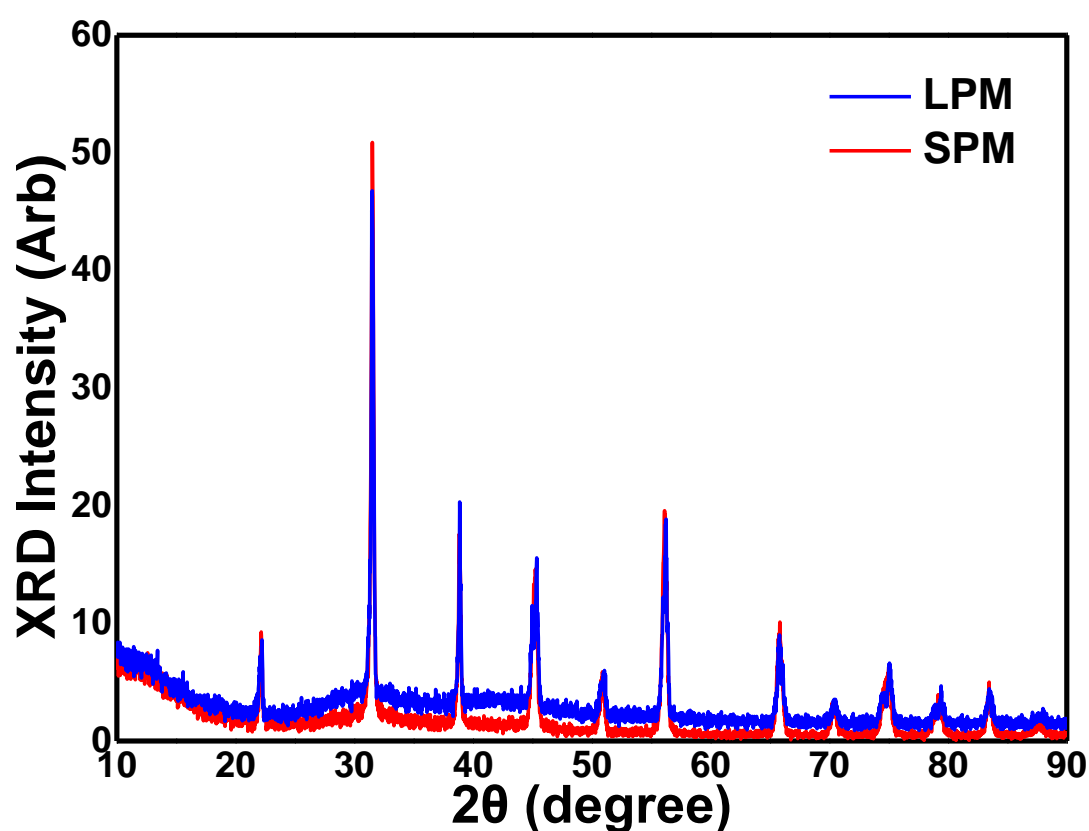

Figure S1. X-ray diffraction (XRD) of LPM and SPM.
